# Supplementary material
Source: publisher site journal article supplement (http://www.spandidos-publications.com/6203/downloadSupplementary)

Figure S1. High-performance liquid chromatography profile of TAT-ATXN1-CTM. TAT, transactivator of transcription protein of HIV-1; ATXN1, ataxin 1; CTM, chaperone-mediated autophagy-targeting motif; Ret. Time, retention time.

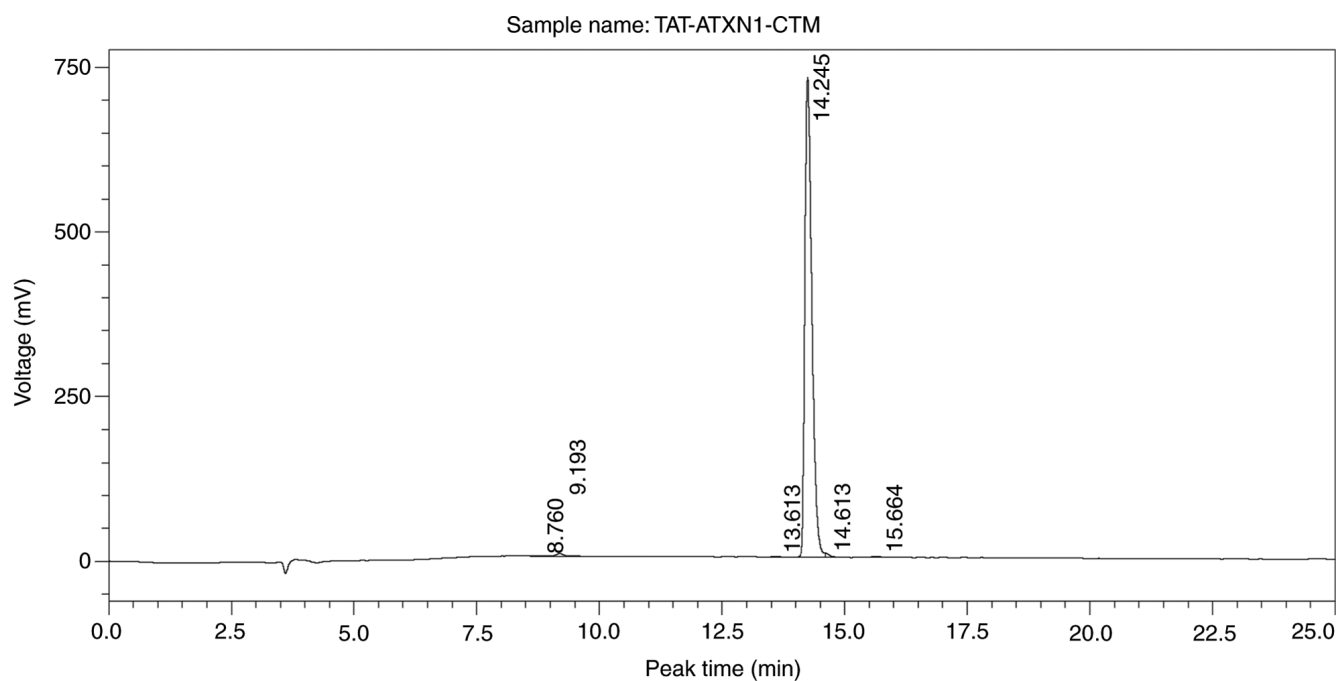

Peak table

| Peak# | Ret. time (min) | Area (uV* min) | Height (uV) | Area (%) |
|-------|-----------------|----------------|-------------|----------|
| 1     | 8.760           | 15105          | 906         | 0.203    |
| 2     | 9.193           | 54098          | 4087        | 0.726    |
| 3     | 13.613          | 9670           | 840         | 0.130    |
| 4     | 14.245          | 7314214        | 728129      | 98.142   |
| 5     | 14.613          | 34760          | 6290        | 0.466    |
| 6     | 15.664          | 24841          | 1982        | 0.333    |
| Total |                 | 7452688        | 742236      | 100.000  |

Figure S2. High-performance liquid chromatography profile of TAT-CTM. TAT, transactivator of transcription protein of HIV-1; CTM, chaperone-mediated autophagy-targeting motif; Ret. Time, retention time.

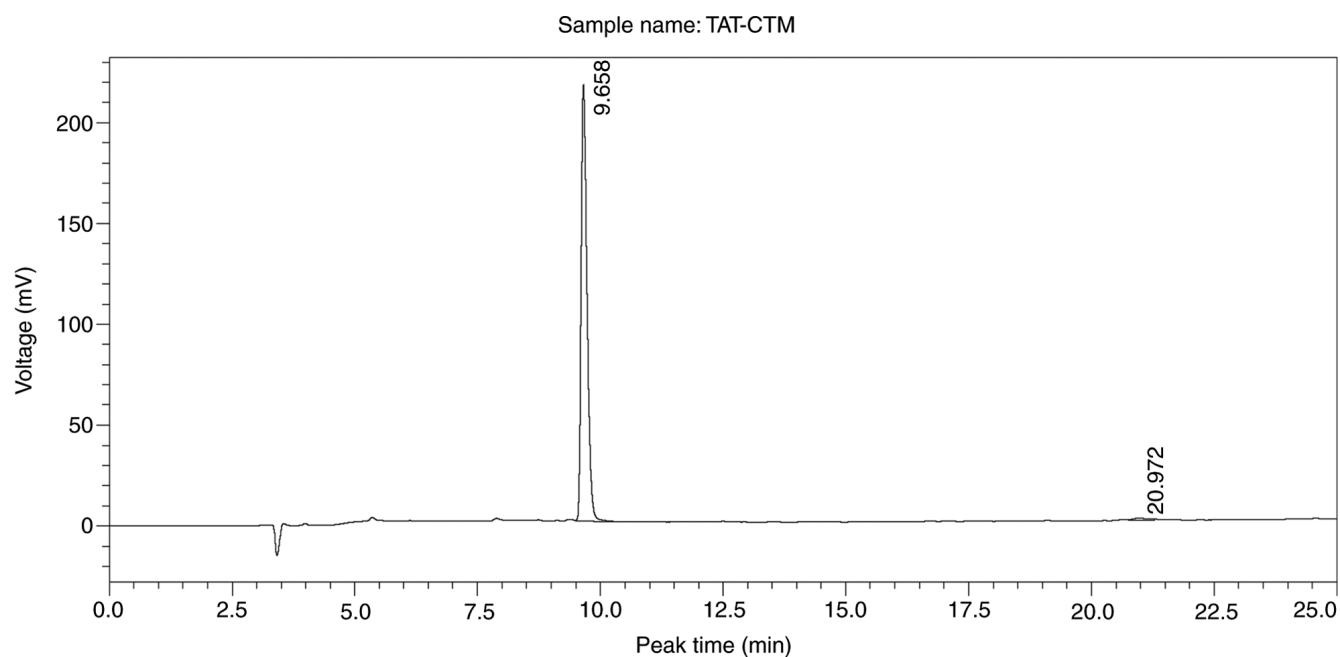

Peak table

| Peak# | Ret. time (min) | Area (uV* min) | Height (uV) | Area (%) |
|-------|-----------------|----------------|-------------|----------|
| 1     | 9.658           | 1807516        | 216713      | 98.879   |
| 2     | 20.972          | 20500          | 928         | 1.121    |
| Total |                 | 1828017        | 217641      | 100.000  |

Figure S3. Mass spectrometry profile of TAT-ATXN1-CTM. TAT, transactivator of transcription protein of HIV-1; ATXN1, ataxin 1; CTM, chaperone-mediated autophagy-targeting motif; MW, molecular weight; ESI, electrospray ionization; CDL, curved desolventization lines; T.Flow, total flow.

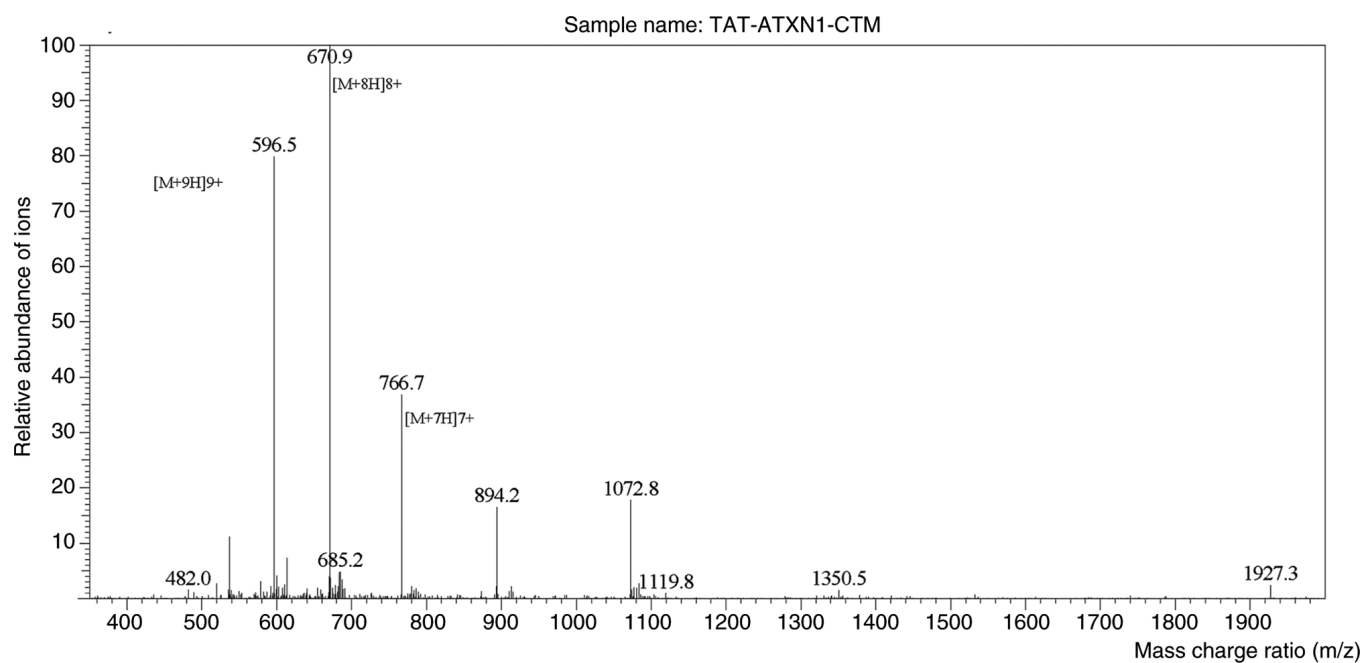

Sample information

Interface: ESI      CDL Temp: 250 °C    Interface bias: +4.5 kV      Theoretical MW: 5359.10    T.Flow: 0.2 ml/min

Nebulizing gas flow: 1.5 l/min    Block temp: 200 °C    Drying gas flow: 5 l/min      Observed MW: 5359.20

Figure S4. Mass spectrometry profile of TAT-CTM. TAT, transactivator of transcription protein of HIV-1; CTM, chaperone-mediated autophagy-targeting motif; MW, molecular weight; ESI, Electrospray Ionization; CDL, Curved desolventization Lines; T.Flow, Total Flow.

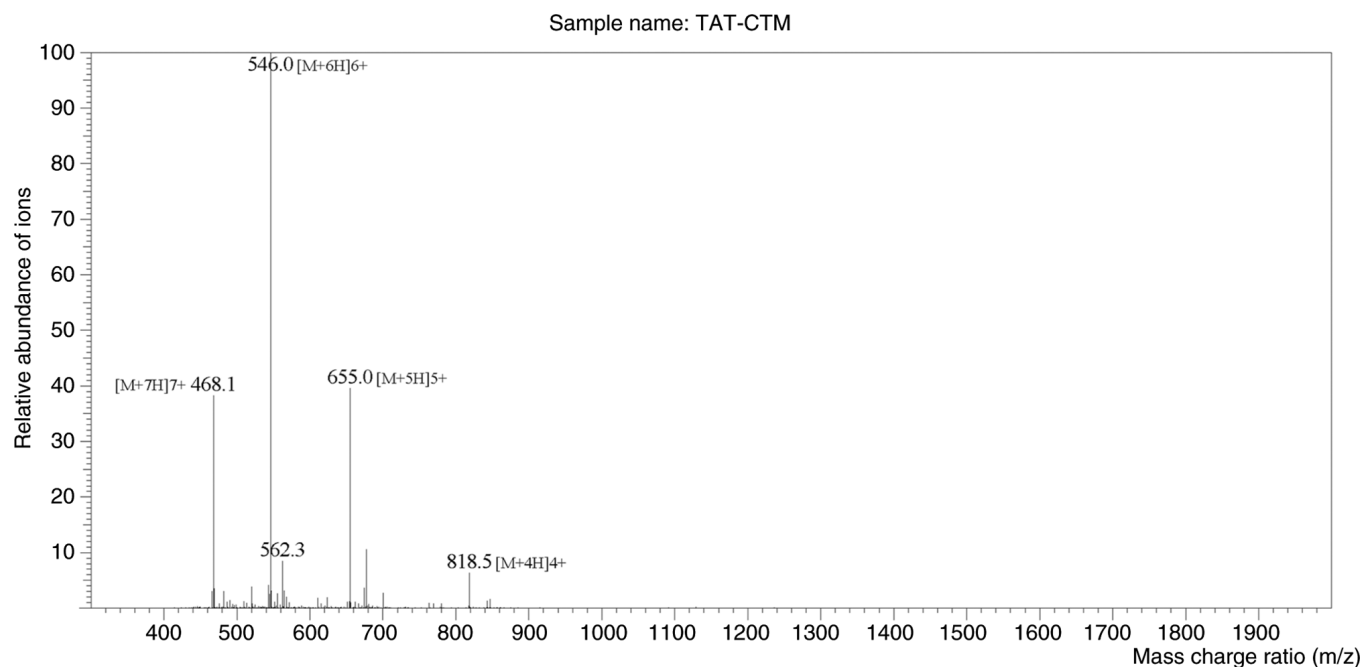

#### Sample Information

|                                |                    |                          |                         |                    |
|--------------------------------|--------------------|--------------------------|-------------------------|--------------------|
| Interface: ESI                 | CDL temp: 250 °C   | Interface bias: +4.5 kV  | Theoretical MW: 3269.78 | T.Flow: 0.2 ml/min |
| Nebulizing gas flow: 1.5 l/min | Block temp: 200 °C | Drying gas flow: 5 l/min | Observed MW: 3270.00    |                    |

Figure S5. HK2 overexpression plasmid increases HK2 mRNA level. Reverse transcription-quantitative PCR analysis of HK2 mRNA expression after transfection with HK2 plasmid or empty vector in 293T cells. Data are presented as the mean  $\pm$  SEM (n=3). An unpaired two-tailed Student's t-test was used to assess significance. ##P<0.01 vs. empty vector. HK2, hexokinase 2.

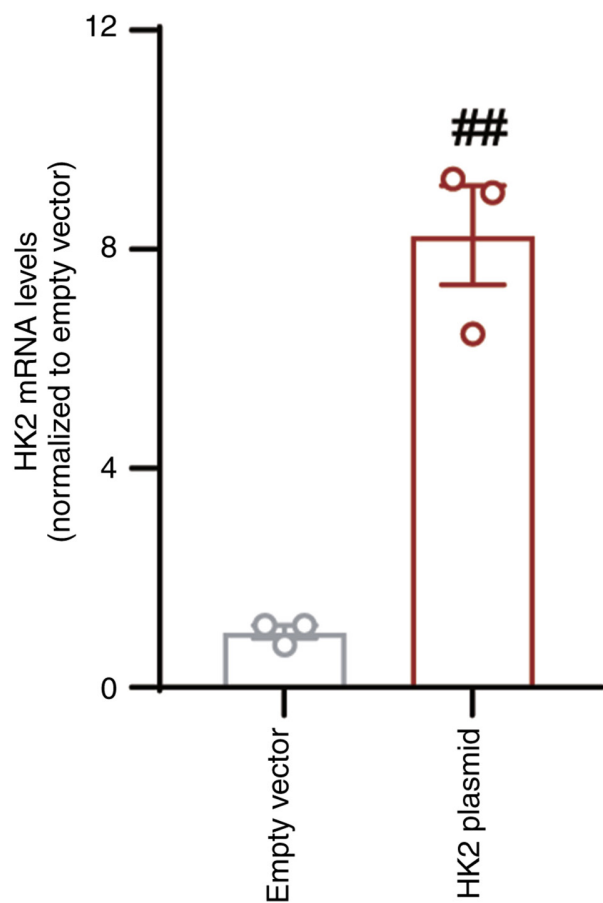

Supplement: Supplementary file 1 [file downloadSupplementary]
